# Supplementary material
Source: Springer Nature journal article supplement (https://www.springermedizin.de/resource/supplementary/12885_2006_613_MOESM4_ESM.pdf/9469896)

total fertility rate per 1,000 women

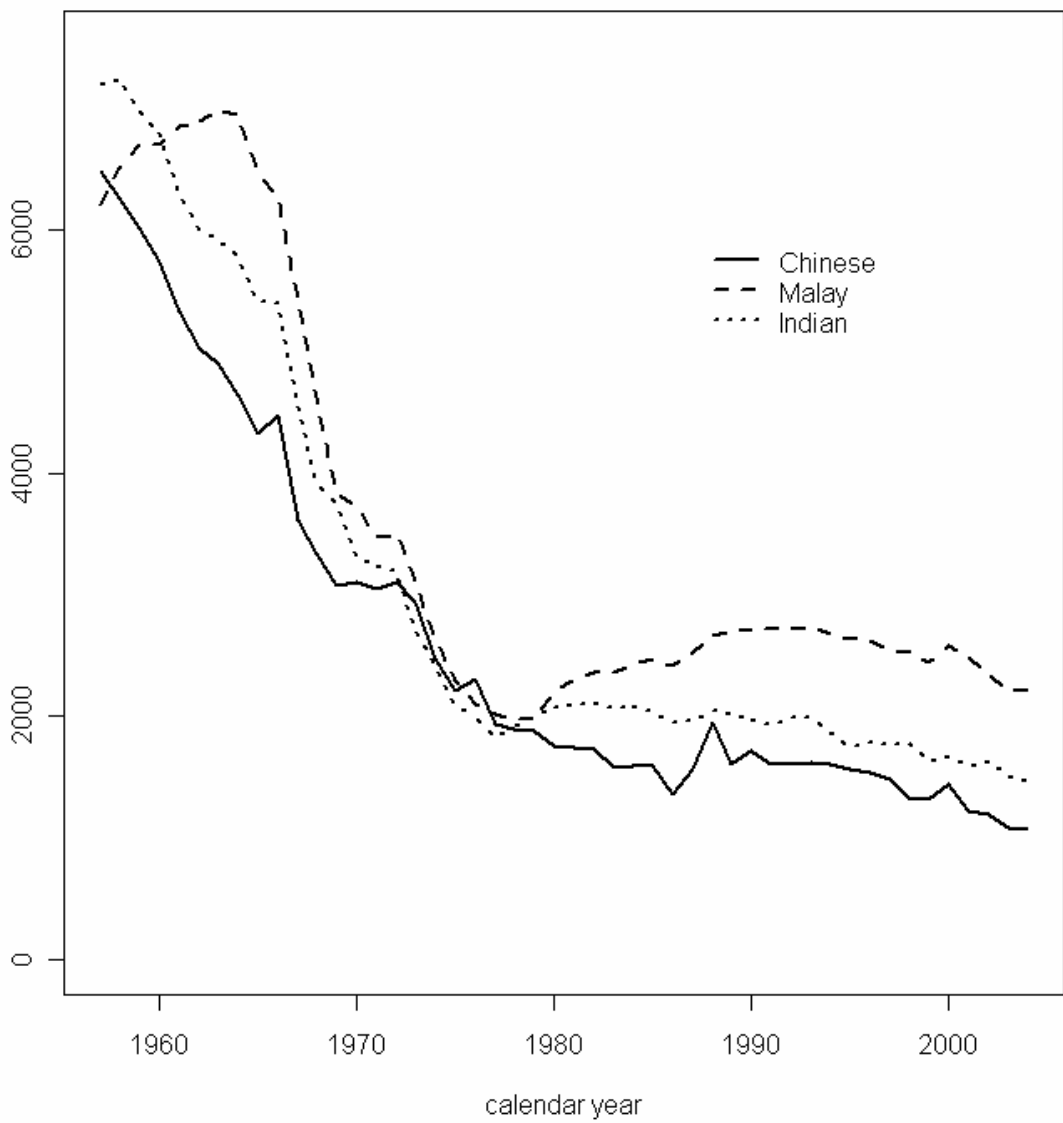

Supplement: MOESM4 [file 9469896]
